# Supplementary material for: Quantifying engineered nanomaterial toxicity: comparison of common cytotoxicity and gene expression measurements
Source: PubMed Central journal article supplement (PMC5679359; doi:10.1186/s12951-017-0312-3), 2017-11-09
Supplement: 12951_2017_312_MOESM1_ESM.pdf [file 12951_2017_312_MOESM1_ESM.pdf]

## Additional File 1

### Quantifying Engineered Nanomaterial Toxicity: Comparison of Common Cytotoxicity and Gene Expression Measurements

Donald H. Atha, Amber Nagy, Andrea Steinbruck, Allison M. Dennis, Jennifer A. Hollingsworth, Varsha Dua, Rashi Iyer and Bryant C. Nelson

**Table S1.** Quantitative RT-PCR of NHBE cells treated with CdSe or InP QDs. Cells were incubated with 5 µg/mL CdSe or InP QDs for 24 h or with 80 µg/mL CdSe or InP QDs for 6 h. Gene expression changes for different classes of cellular functions and processes were measured by quantitative qRT-PCR. Values are expressed as fold change relative to media controls (=1.0). Blue text indicates a 2-fold or greater decrease in gene expression relative to untreated cells ( $\leq 0.5$ ) while red text highlights two-fold or greater increase in gene expression relative to untreated cells ( $\geq 2.0$ ). All experiments were independently repeated three times (n=3). Errors represent one standard deviation.

| CELL RESPONSE PATHWAY                         | GENE NAME   | FOLD CHANGE<br>(5 µg/mL, 24 hrs) |              |
|-----------------------------------------------|-------------|----------------------------------|--------------|
|                                               |             | 5 nm CdSe-MUA                    | 5 nm InP-MUA |
| Adhesion and Invasion                         | ITGA2       | 1.45 ± 0.13                      | 3.01 ± 0.26  |
|                                               | MMP1        | 1.03 ± 0.05                      | 3.26 ± 0.33  |
| Apoptosis                                     | BAK1        | 1.22 ± 0.51                      | 1.11 ± 0.68  |
|                                               | BCL2        | 0.77 ± 0.04                      | 0.47 ± 0.03  |
| Autophagy                                     | ULK1        | 1.28 ± 0.02                      | 1.68 ± 0.06  |
|                                               | WIPI1       | 1.47 ± 0.03                      | 1.82 ± 0.15  |
| DNA Damage                                    | CDK1        | 0.50 ± 0.15                      | 0.21 ± 0.09  |
|                                               | GADD45A     | 1.18 ± 0.02                      | 1.00 ± 0.09  |
|                                               | SFN         | 1.50 ± 0.04                      | 1.75 ± 0.04  |
| DNA Repair                                    | BRCA1       | 0.55 ± 0.07                      | 0.18 ± 0.03  |
|                                               | BRCA2       | 0.57 ± 0.07                      | 0.20 ± 0.02  |
|                                               | XPC         | 0.89 ± 0.02                      | 0.79 ± 0.05  |
| Mitochondrial Function and Metabolism         | AHR         | 0.99 ± 0.04                      | 1.11 ± 0.05  |
|                                               | CYP1A1      | 1.02 ± 0.11                      | 1.17 ± 0.17  |
|                                               | CYP1B1      | 1.29 ± 0.02                      | 1.16 ± 0.07  |
|                                               | DHFR        | 0.57 ± 0.02                      | 0.40 ± 0.02  |
|                                               | UCP1        | 2.29 ± 0.50                      | 2.20 ± 1.64  |
| Proinflammatory Cytokines and Chemokines      | CSF2        | 1.50 ± 0.04                      | 5.01 ± 0.35  |
|                                               | FAS         | 1.18 ± 0.06                      | 1.06 ± 0.11  |
|                                               | IFNA1       | 2.02 ± 0.38                      | 4.05 ± 0.44  |
|                                               | IL1A        | 1.43 ± 0.11                      | 2.88 ± 0.03  |
|                                               | IL1B        | 1.11 ± 0.07                      | 1.24 ± 0.06  |
|                                               | IL6         | 1.40 ± 0.07                      | 1.02 ± 0.05  |
|                                               | IL8         | 1.27 ± 0.07                      | 6.56 ± 0.34  |
|                                               | TNF         | 0.64 ± 0.10                      | 1.18 ± 0.38  |
| CXCL1                                         | 1.27 ± 0.06 | 1.92 ± 0.15                      |              |
| Proliferation                                 | VEGFA       | 1.43 ± 0.05                      | 1.44 ± 0.17  |
| Signal Transduction and Transcription Factors | FOS         | 0.91 ± 0.02                      | 1.07 ± 0.06  |
|                                               | JUN         | 1.12 ± 0.17                      | 1.26 ± 0.30  |
|                                               | MYC         | 0.96 ± 0.03                      | 1.01 ± 0.04  |
|                                               | PIK3R1      | 0.93 ± 0.04                      | 0.99 ± 0.09  |

| CELL RESPONSE PATHWAY                         | GENE NAME   | FOLD CHANGE<br>(80 µg/mL, 6 hrs) |              |
|-----------------------------------------------|-------------|----------------------------------|--------------|
|                                               |             | 5 nm CdSe-MUA                    | 5 nm InP-MUA |
| Adhesion and Invasion                         | ITGA2       | 1.18 ± 0.20                      | 1.19 ± 0.22  |
|                                               | MMP1        | 1.33 ± 0.07                      | 1.05 ± 0.11  |
| Apoptosis                                     | BAK1        | 0.59 ± 0.25                      | 2.56 ± 0.40  |
|                                               | BCL2        | 0.63 ± 0.12                      | 5.77 ± 1.43  |
| Autophagy                                     | ULK1        | 1.90 ± 0.35                      | 2.93 ± 0.26  |
|                                               | WIPI1       | 1.21 ± 0.16                      | 2.97 ± 0.47  |
| DNA Damage                                    | CDK1        | 1.92 ± 0.10                      | 1.15 ± 0.01  |
|                                               | GADD45A     | 4.17 ± 0.95                      | 4.95 ± 0.66  |
|                                               | SFN         | 2.84 ± 0.50                      | 0.86 ± 0.44  |
| DNA Repair                                    | BRCA1       | 1.20 ± 0.05                      | 0.96 ± 0.22  |
|                                               | BRCA2       | 3.06 ± 0.48                      | 0.43 ± 0.17  |
|                                               | XPC         | 0.84 ± 0.15                      | 2.29 ± 0.15  |
| Mitochondrial Function and Metabolism         | AHR         | 2.18 ± 0.29                      | 2.35 ± 0.43  |
|                                               | CYP1A1      | 1.38 ± 0.35                      | 0.17 ± 0.04  |
|                                               | CYP1B1      | 3.19 ± 0.46                      | 0.70 ± 0.09  |
|                                               | DHFR        | 1.10 ± 0.10                      | 1.15 ± 0.07  |
|                                               | UCP1        | 4.32 ± 0.87                      | 7.20 ± 0.51  |
| Proinflammatory Cytokines and Chemokines      | CSF2        | 3.24 ± 0.59                      | 0.19 ± 0.09  |
|                                               | FAS         | 0.67 ± 0.12                      | 0.50 ± 0.04  |
|                                               | IFNA1       | 2.25 ± 0.22                      | 1.79 ± 0.37  |
|                                               | IL1A        | 2.62 ± 1.16                      | 1.76 ± 1.42  |
|                                               | IL1B        | 0.41 ± 0.09                      | 0.37 ± 0.06  |
|                                               | IL6         | 0.82 ± 0.17                      | 0.40 ± 0.12  |
|                                               | IL8         | 18.36 ± 3.79                     | 2.53 ± 0.23  |
|                                               | TNF         | 6.50 ± 1.61                      | 5.24 ± 0.74  |
| CXCL1                                         | 0.31 ± 0.07 | 0.27 ± 0.09                      |              |
| Proliferation                                 | VEGFA       | 2.18 ± 0.48                      | 1.21 ± 0.16  |
| Signal Transduction and Transcription Factors | FOS         | 0.17 ± 0.03                      | 0.52 ± 0.07  |
|                                               | JUN         | 2.24 ± 0.58                      | 0.82 ± 0.21  |
|                                               | MYC         | 0.08 ± 0.01                      | 0.28 ± 0.06  |
|                                               | PIK3R1      | 0.36 ± 0.05                      | 0.52 ± 0.05  |
